# Supplementary material for: Relation between smoking history and gene expression profiles in lung adenocarcinomas
Source: PubMed Central journal article supplement (PMC3447685; doi:10.1186/1755-8794-5-22), 2012-06-07

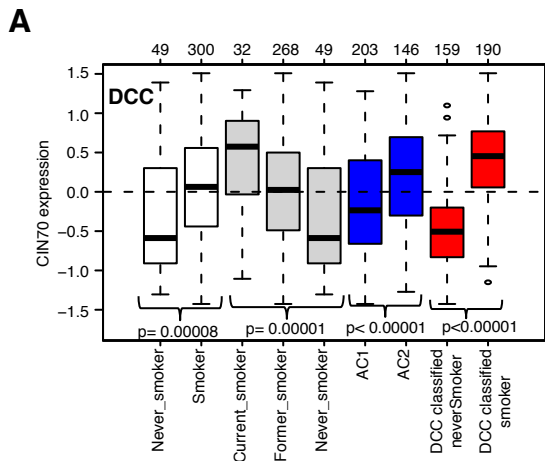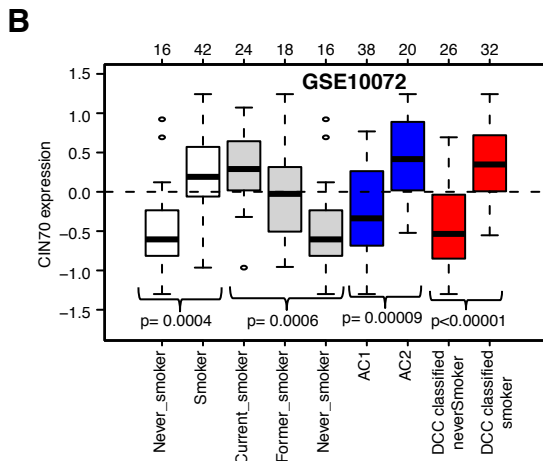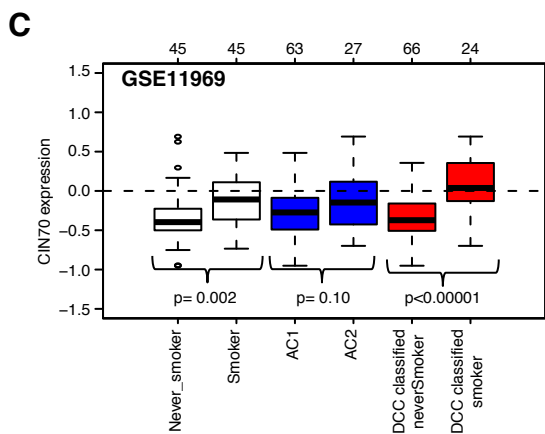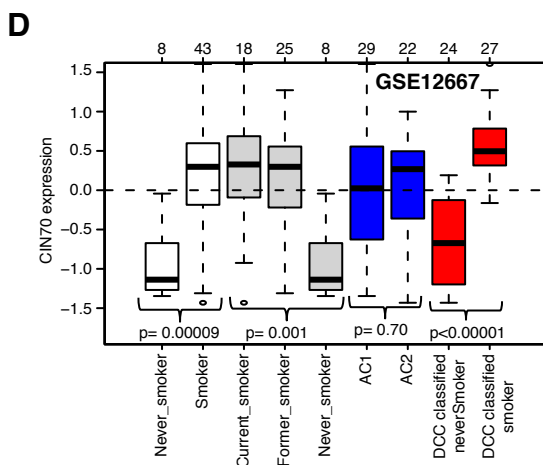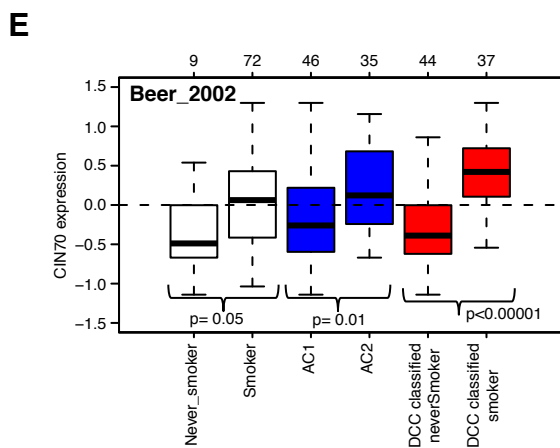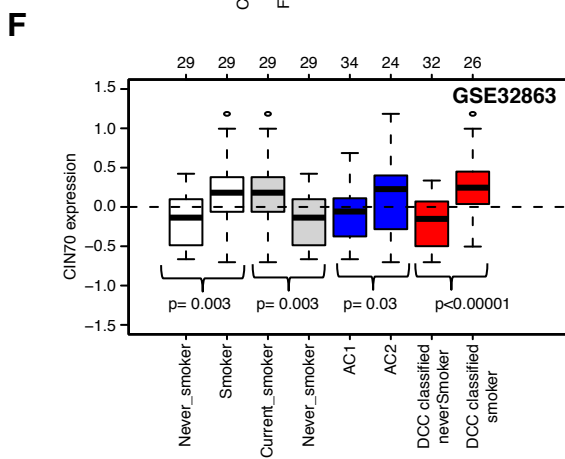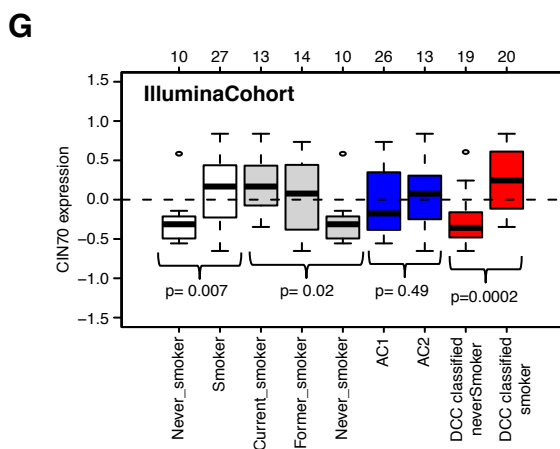

Supplement: 1755-8794-5-22-S5.pdf [file 1755-8794-5-22-S5.pdf]
